# Supplementary material for: Origin and Spread of the Dengue Virus Type 1, Genotype V in Senegal, 2015–2019
Source: PubMed Central journal article supplement (PMC7824722; doi:10.3390/v13010057), 2021-01-04
Supplement: viruses-13-00057-s001.pdf [file viruses-13-00057-s001.pdf]

**Table S1.** Dengue virus 1 Envelope gene sequences used in the genotype phylogenetic analysis.

| <b>Genotype</b> | <b>GenBank accession number</b> | <b>Strain</b>               | <b>Local of isolation</b> | <b>Year of isolation</b> |
|-----------------|---------------------------------|-----------------------------|---------------------------|--------------------------|
| Genotype 1      | KU509258                        | DENV12522                   | Eritrea                   | 2010                     |
| Genotype 1      | KX056474                        | DENV1/China/YN/15DGR4102015 | China                     | 2015                     |
| Genotype 1      | MH594897                        | NIV1740000NashikIndia2017   | India                     | 2017                     |
| Genotype 1      | MK506262                        | hawaii2007                  | Thailand                  | 2007                     |
| Genotype 1      | Q868637                         | DENV1/IPC/BIDV3919/2000     | Cambodia                  | 2000                     |
| Genotype 2      | AF425629                        | 254363                      | Thailand                  | 1963                     |
| Genotype 2      | D10513                          | TH-SMAN                     | Thailand                  | 1954                     |
| Genotype 2      | JF297570                        | 606147                      | Thailand                  | 1960                     |
| Genotype 2      | JQ922547                        | DENV1/THAI/606147/1960      | Thailand                  | 1960                     |
| Genotype 2      | KC589010                        | SMGSE003                    | Indonesia                 | 2012                     |
| Genotype 3      | EF457905                        | P721244                     | Malaysia                  | 1972                     |
| Genotype 3      | FN825674                        | D1/Malaysia/36046/05        | Malaysia                  | 2005                     |
| Genotype 4      | KY275197                        | D1/Timor/804/2010           | EastTimor                 | 2010                     |
| Genotype 4      | MG894909                        | D1/Indonesia/1602aTw        | Taiwan                    | 2016                     |
| Genotype 4      | MG894962                        | D1/Indonesia/1611aTw        | Taiwan                    | 2016                     |
| Genotype 4      | MH634401                        | US/DB202/2001               | USA                       | 2001                     |
| Genotype 4      | MH921567                        | PNG 2016                    | Australia                 | 2016                     |
| Genotype 5      | KF184975                        | Angola2013                  | Angola                    | 2013                     |
| Genotype 5      | MG877557                        | Gabon2012                   | Gabon                     | 2012                     |
| Genotype 5      | MH401998                        | KCMM25/BR/MS/2016           | Brazil                    | 2016                     |
| Genotype 5      | MH679991                        | SGEHID1/50613Y14            | Singapore                 | 2013                     |
| Genotype 5      | MK039555                        | US/DB225/2013               | Puerto Rico               | 2013                     |
| Genotype 5      |                                 | 273756                      | Medina Gounass - Senegal  | 2015                     |
| Genotype 5      |                                 | 297855                      | Mali                      | 2017                     |
| Genotype 5      |                                 | 297914                      | Louga - Senegal           | 2017                     |
| Genotype 5      |                                 | 297918                      | Louga - Senegal           | 2017                     |
| Genotype 5      |                                 | 297919                      | Louga - Senegal           | 2017                     |
| Genotype 5      |                                 | 298272                      | Louga - Senegal           | 2017                     |
| Genotype 5      |                                 | 302883                      | Louga - Senegal           | 2017                     |
| Genotype 5      |                                 | 303165                      | Louga - Senegal           | 2017                     |
| Genotype 5      |                                 | 307339                      | Louga - Senegal           | 2017                     |
| Genotype 5      |                                 | 307419                      | Louga - Senegal           | 2017                     |
| Genotype 5      |                                 | 307424                      | Louga - Senegal           | 2017                     |
| Genotype 5      |                                 | 310386                      | SaintLouis - Senegal      | 2018                     |
| Genotype 5      |                                 | 310460                      | Dakar - Senegal           | 2018                     |
| Genotype 5      |                                 | 313165                      | Fatick - Senegal          | 2018                     |
| Genotype 5      |                                 | 313167                      | Fatick - Senegal          | 2018                     |
| Genotype 5      |                                 | 313169                      | Fatick - Senegal          | 2018                     |
| Genotype 5      |                                 | 313639                      | Fatick - Senegal          | 2018                     |
| Genotype 5      |                                 | 313644                      | Fatick - Senegal          | 2018                     |
| Genotype 5      |                                 | 313718                      | Fatick - Senegal          | 2018                     |
| Genotype 5      |                                 | 313852                      | Fatick - Senegal          | 2018                     |
| Genotype 5      |                                 | 313943                      | Fatick - Senegal          | 2018                     |
| Genotype 5      |                                 | 313990                      | Fatick - Senegal          | 2018                     |
| Genotype 5      |                                 | 313997                      | Fatick - Senegal          | 2018                     |
| Genotype 5      |                                 | 314074                      | Fatick - Senegal          | 2018                     |

|            |  |        |                    |      |
|------------|--|--------|--------------------|------|
| Genotype 5 |  | 314343 | Fatick - Senegal   | 2018 |
| Genotype 5 |  | 314438 | Fatick - Senegal   | 2018 |
| Genotype 5 |  | 316359 | Diourbel - Senegal | 2018 |
| Genotype 5 |  | 316382 | Diourbel - Senegal | 2018 |
| Genotype 5 |  | 316413 | Diourbel - Senegal | 2018 |
| Genotype 5 |  | 316447 | Diourbel - Senegal | 2018 |
| Genotype 5 |  | 316474 | Diourbel - Senegal | 2018 |
| Genotype 5 |  | 316548 | Diourbel - Senegal | 2018 |
| Genotype 5 |  | 316647 | Diourbel - Senegal | 2018 |
| Genotype 5 |  | 316649 | Diourbel - Senegal | 2018 |
| Genotype 5 |  | 318267 | Louga - Senegal    | 2019 |
| Genotype 5 |  | 318479 | Louga - Senegal    | 2019 |

**Table S2.** Dengue virus 1 Envelope gene sequences used in the phylogeographic and phylodynamics analysis.

| <b>Genotype</b> | <b>GenBank accession number</b> | <b>Strain</b>               | <b>Local of isolation</b> | <b>Year of isolation</b> |
|-----------------|---------------------------------|-----------------------------|---------------------------|--------------------------|
| Genotype 5      | KF184975                        | Angola2013                  | Angola                    | 2013                     |
| Genotype 5      | KM277613                        | AO/DB135/2013               | Angola                    | 2013                     |
| Genotype 5      | KM277610                        | AO/DB132/2013               | Angola                    | 2013                     |
| Genotype 5      | KM277612                        | AO/DB134/2013               | Angola                    | 2013                     |
| Genotype 5      | KT825063                        | Cairns2014c                 | Australia                 | 2014                     |
| Genotype 5      | KT825067                        | Cairns2015                  | Australia                 | 2015                     |
| Genotype 5      | JN036371                        | BDH809/DENV1                | Bangladesh                | 2009                     |
| Genotype 5      | KP849868                        | D1/Bhutan/P13085            | Bhutan                    | 2013                     |
| Genotype 5      | KP849880                        | D1/Bhutan/P13139            | Bhutan                    | 2013                     |
| Genotype 5      | KP849885                        | D1/Bhutan/P13152            | Bhutan                    | 2013                     |
| Genotype 5      | KP849888                        | D1/Bhutan/P13156            | Bhutan                    | 2013                     |
| Genotype 5      | KP849864                        | D1/Bhutan/P13064            | Bhutan                    | 2013                     |
| Genotype 5      | EU179860                        | DS06210505                  | Brunei                    | 2005                     |
| Genotype 5      | KJ415094                        | ZJ/03/13                    | China                     | 2013                     |
| Genotype 5      | MG560224                        | P1058/China/GD/GZ/2014      | China                     | 2014                     |
| Genotype 5      | MG560223                        | P1057/China/GD/GZ/2014      | China                     | 2014                     |
| Genotype 5      | KF864667                        | Zj/yw01                     | China                     | 2013                     |
| Genotype 5      | KT453243                        | FSD14020                    | China                     | 2014                     |
| Genotype 5      | DQ285562                        | Comoros04.329/93            | Comoros                   | 1993                     |
| Genotype 5      | MG877557                        | Gabon2012                   | Gabon                     | 2012                     |
| Genotype 5      | KF289073                        | P23086                      | India                     | 1956                     |
| Genotype 5      | MG721063                        | R1J10                       | India                     | 2016                     |
| Genotype 5      | MH594879                        | NIV1733212NashikIndia2017   | India                     | 2017                     |
| Genotype 5      | MH594894                        | NIV1738925NashikIndia2017   | India                     | 2017                     |
| Genotype 5      | JN415507                        | India2008                   | India                     | 2008                     |
| Genotype 5      | KT825056                        | Indonesia2013b              | Indonesia                 | 2013                     |
| Genotype 5      | LC038147                        | D1/Hu/Indonesia/NIID75/2014 | Indonesia                 | 2014                     |
| Genotype 5      | KJ806818                        | MYSSelangorD1/5124Y12       | Malaysia                  | 2012                     |
| Genotype 5      | KT175087                        | D1/Malaysia/1408aTw         | Malaysia                  | 2014                     |
| Genotype 5      | KT175089                        | D1/Malaysia/1412bTw         | Malaysia                  | 2014                     |
| Genotype 5      | KU666943                        | TM242                       | Malaysia                  | 2014                     |
| Genotype 5      | LC038145                        | D1/Hu/Malaysia/NIID64/2014  | Malaysia                  | 2014                     |
| Genotype 5      | KY495795                        | Maldives2016                | Maldives                  | 2016                     |

|            |          |                  |                          |      |
|------------|----------|------------------|--------------------------|------|
| Genotype 5 | KT825026 | Maldives2014     | Maldives                 | 2014 |
| Genotype 5 | JF800928 | DbH2010          | Nepal                    | 2010 |
| Genotype 5 | JF754981 | NBH2910          | Nepal                    | 2010 |
| Genotype 5 | JF754982 | NBPH1210         | Nepal                    | 2010 |
| Genotype 5 | JF754980 | NBH1210          | Nepal                    | 2010 |
| Genotype 5 | AM746218 | 945              | Saudi Arabia             | 1994 |
| Genotype 5 | AM746219 | 841              | Saudi Arabia             | 1994 |
| Genotype 5 |          | 297855           | Mali                     | 2017 |
| Genotype 5 |          | 314438           | Fatick - Senegal         | 2018 |
| Genotype 5 |          | 316474           | Diourbel - Senegal       | 2018 |
| Genotype 5 |          | 318479           | Louga - Senegal          | 2019 |
| Genotype 5 |          | 316447           | Diourbel - Senegal       | 2018 |
| Genotype 5 |          | 316548           | Diourbel - Senegal       | 2018 |
| Genotype 5 |          | 316649           | Diourbel - Senegal       | 2018 |
| Genotype 5 |          | 310386           | SaintLouis - Senegal     | 2018 |
| Genotype 5 |          | 316413           | Diourbel - Senegal       | 2018 |
| Genotype 5 |          | 316647           | Diourbel - Senegal       | 2018 |
| Genotype 5 |          | 310460           | Dakar - Senegal          | 2018 |
| Genotype 5 |          | 316382           | Diourbel - Senegal       | 2018 |
| Genotype 5 |          | 316359           | Diourbel - Senegal       | 2018 |
| Genotype 5 |          | 318267           | Louga - Senegal          | 2019 |
| Genotype 5 |          | 307424           | Louga - Senegal          | 2017 |
| Genotype 5 |          | 307419           | Louga - Senegal          | 2017 |
| Genotype 5 |          | 297918           | Louga - Senegal          | 2017 |
| Genotype 5 |          | 298272           | Louga - Senegal          | 2017 |
| Genotype 5 |          | 297914           | Louga - Senegal          | 2017 |
| Genotype 5 |          | 297919           | Louga - Senegal          | 2017 |
| Genotype 5 |          | 302883           | Louga - Senegal          | 2017 |
| Genotype 5 |          | 303165           | Louga - Senegal          | 2017 |
| Genotype 5 |          | 273756           | Medina Gounass - Senegal | 2015 |
| Genotype 5 |          | 307339           | Louga - Senegal          | 2017 |
| Genotype 5 |          | 313639           | Fatick - Senegal         | 2018 |
| Genotype 5 |          | 313165           | Fatick - Senegal         | 2018 |
| Genotype 5 |          | 313167           | Fatick - Senegal         | 2018 |
| Genotype 5 |          | 313169           | Fatick - Senegal         | 2018 |
| Genotype 5 |          | 313644           | Fatick - Senegal         | 2018 |
| Genotype 5 |          | 313718           | Fatick - Senegal         | 2018 |
| Genotype 5 |          | 313852           | Fatick - Senegal         | 2018 |
| Genotype 5 |          | 313943           | Fatick - Senegal         | 2018 |
| Genotype 5 |          | 313997           | Fatick - Senegal         | 2018 |
| Genotype 5 |          | 314074           | Fatick - Senegal         | 2018 |
| Genotype 5 |          | 314343           | Fatick - Senegal         | 2018 |
| Genotype 5 |          | 313990           | Fatick - Senegal         | 2018 |
| Genotype 5 | GQ357690 | SGEHIDED06807    | Singapore                | 2007 |
| Genotype 5 | JN544409 | SGEHID1/09106Y11 | Singapore                | 2011 |
| Genotype 5 | GQ357692 | SGEHIDED65008    | Singapore                | 2008 |
| Genotype 5 | MF033212 | 50458            | Singapore                | 2013 |
| Genotype 5 | MH679991 | SGEHID1/50613Y14 | Singapore                | 2013 |
| Genotype 5 | EF654104 | DenKor01         | SouthKorea               | 2004 |
| Genotype 5 | FJ687475 | DenKor08         | SouthKorea               | 2006 |

|            |          |                      |          |      |
|------------|----------|----------------------|----------|------|
| Genotype 5 | JN415524 | SriLanka2004         | SriLanka | 2004 |
| Genotype 5 | MG894702 | D1/Malaysia/1205aTw  | Taiwan   | 2012 |
| Genotype 5 | MG894694 | D1/India/1110bTw     | Taiwan   | 2011 |
| Genotype 5 | MG894919 | D1/Singapore/1606aTw | Taiwan   | 2016 |
| Genotype 5 | MG894946 | D1/Malaysia/1609aTw  | Taiwan   | 2016 |
| Genotype 5 | MG894764 | D1/Singapore/1306aTw | Taiwan   | 2013 |
| Genotype 5 | AY732379 | ThD1003883           | Thailand | 1983 |
| Genotype 5 | AY732447 | ThD1067380           | Thailand | 1980 |
| Genotype 5 | AY732429 | ThD1044280           | Thailand | 1980 |
| Genotype 5 | AY732411 | ThD1012780           | Thailand | 1980 |
| Genotype 5 | KT825042 | Thailand2015a        | Thailand | 2015 |

**Table S3.** Model comparison of strict molecular clock and demographic growth models through path sampling (PS) and stepping stone (SS) methods. Bold numbers indicate the best fitting model.

| <b>Relaxed molecular clock</b>  |                 |                 |
|---------------------------------|-----------------|-----------------|
| <b>Demographic growth model</b> | <b>PS</b>       | <b>SS</b>       |
| <b>Bayesian skyline plot</b>    | <b>-5921.05</b> | <b>-5921.23</b> |
| Bayesian skyride plot           | -5964.50        | -5965.67        |
| Bayesian skygrid model          | -5932.60        | -5932.83        |

PS: Path sampling; SS: Stepping stone.
